# Supplementary material for: Association of Liver-Directed Local Therapy With Overall Survival in Adults With Metastatic Intrahepatic Cholangiocarcinoma
Source: PubMed Central journal article supplement (PMC6745054; doi:10.1001/jamanetworkopen.2019.11154), 2019-09-13
Supplement: jamanetwopen-2-e1911154-s001.pdf [file jamanetwopen-2-e1911154-s001.pdf]

## Supplementary Online Content

Sebastian NT, Tan Y, Miller ED, et al. Association of liver-directed local therapy with overall survival in adults with metastatic intrahepatic cholangiocarcinoma. *JAMA Netw Open*. 2019;2(9):e1911154. doi:10.1001/jamanetworkopen.2019.11154

**eFigure.** Sequential Landmark Kaplan-Meier Curves, Stratified by Receipt of Liver-Directed Local Therapy (LDLT)

**eTable.** Patient and Disease Characteristics of the Propensity Matched Cohort, Stratified by Receipt of Liver-Directed Local Therapy (LDLT)

This supplementary material has been provided by the authors to give readers additional information about their work.

**eFigure.** Sequential Landmark Kaplan-Meier Curves, Stratified by Receipt of Liver-Directed Local Therapy (LDLT)

**(A) 3-Months**

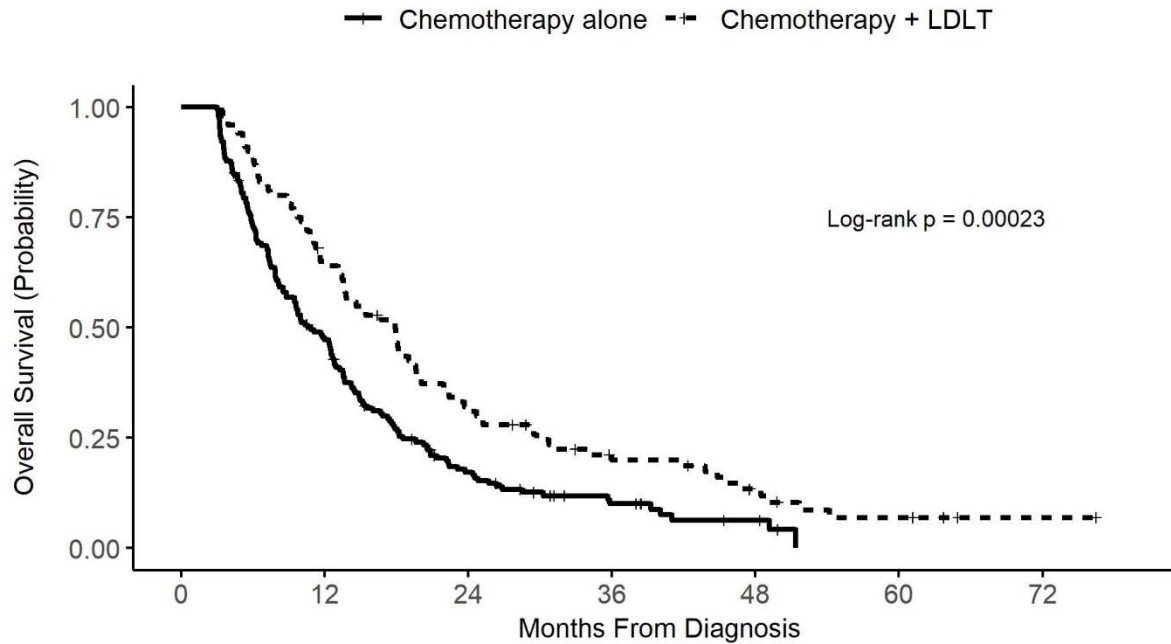

|                     |     |    |    |    |   |   |   |
|---------------------|-----|----|----|----|---|---|---|
| Chemotherapy alone  | 180 | 83 | 27 | 11 | 4 | 0 | 0 |
| Chemotherapy + LDLT | 100 | 64 | 31 | 17 | 9 | 4 | 1 |

**(B) 6 Months**

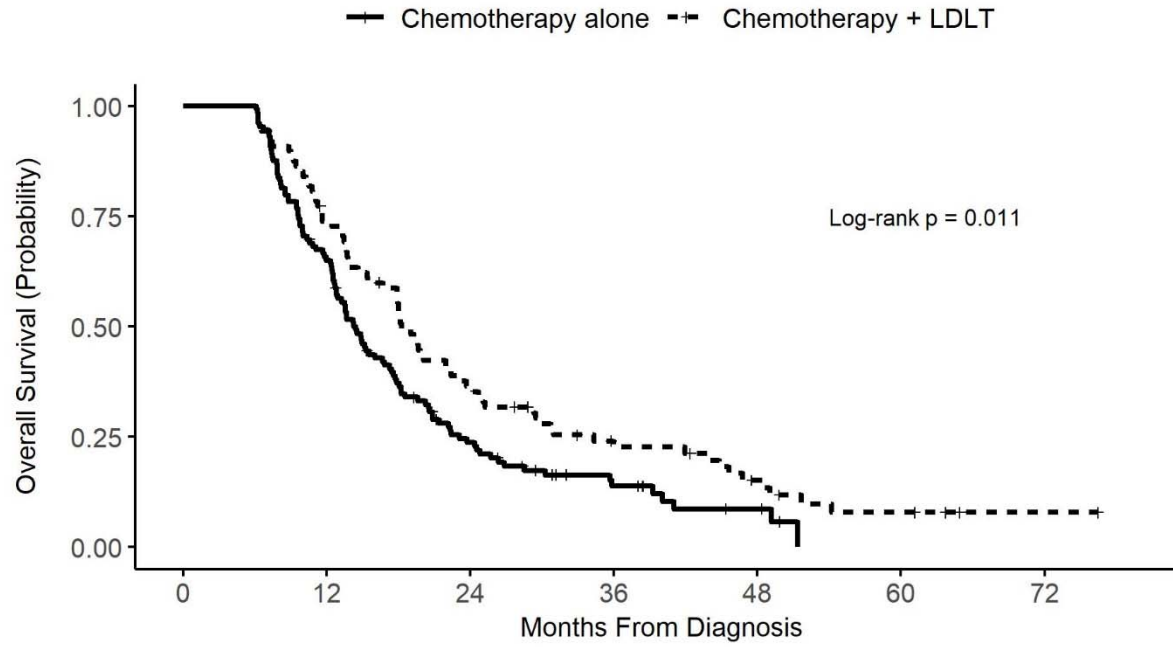

|                     |     |    |    |    |   |   |   |
|---------------------|-----|----|----|----|---|---|---|
| Chemotherapy alone  | 129 | 83 | 27 | 11 | 4 | 0 | 0 |
| Chemotherapy + LDLT | 88  | 64 | 31 | 17 | 9 | 4 | 1 |

**(C) 12 Months**

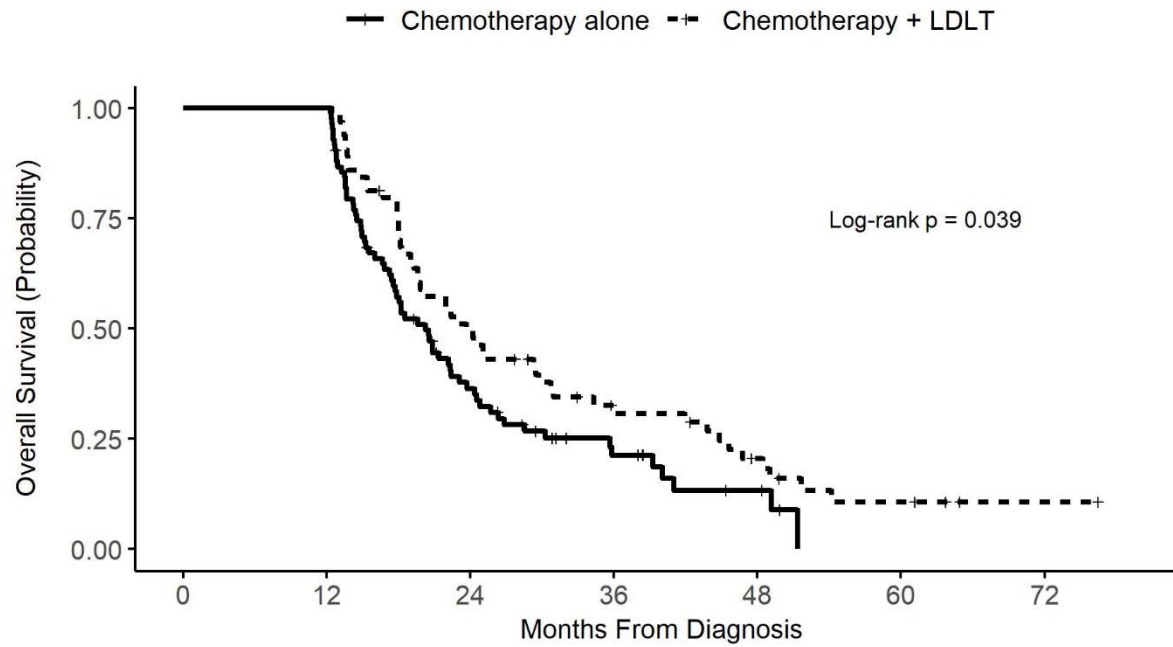

|                     |    |    |    |    |   |   |   |
|---------------------|----|----|----|----|---|---|---|
| Chemotherapy alone  | 83 | 83 | 27 | 11 | 4 | 0 | 0 |
| Chemotherapy + LDLT | 64 | 64 | 31 | 17 | 9 | 4 | 1 |

**eTable.** Patient and Disease Characteristics of the Propensity Matched Cohort, Stratified by Receipt of Liver-Directed Local Therapy (LDLT)

| <b>Characteristic</b>                                                                                                                                     | <b>Chemotherapy Alone<br/>(n = 104)</b>            | <b>Chemotherapy + LDLT<br/>(n = 104)</b>           | <b>P</b>          |
|-----------------------------------------------------------------------------------------------------------------------------------------------------------|----------------------------------------------------|----------------------------------------------------|-------------------|
| <b>Age</b><br>Median (IQR)                                                                                                                                | 62.0 (54 - 70)                                     | 61.5 (54.0 - 70.2)                                 | 0.76 <sup>†</sup> |
| <b>Sex</b><br>Male<br>Female                                                                                                                              | 47 (45.2%)<br>57 (54.8%)                           | 46 (44.2%)<br>58 (55.8%)                           | 1.00 <sup>‡</sup> |
| <b>Race</b><br>White<br>Black<br>Other                                                                                                                    | 94 (90.4%)<br>8 (7.7%)<br>2 (1.9%)                 | 90 (86.5%)<br>9 (8.7%)<br>5 (4.8%)                 | 0.55 <sup>‡</sup> |
| <b>Charlson Comorbidity Score</b><br>0<br>1<br>2<br>3+                                                                                                    | 76 (73.1%)<br>21 (20.2%)<br>7 (6.7%)<br>0 (0.0%)   | 73 (70.2%)<br>25 (24.0%)<br>5 (4.8%)<br>1 (1.0%)   | 0.69 <sup>‡</sup> |
| <b>Insurance Status</b><br>No Insurance<br>Private<br>Government                                                                                          | 4 (3.8%)<br>55 (52.9%)<br>45 (43.3%)               | 5 (4.8%)<br>51 (49.0%)<br>48 (46.2%)               | 0.83 <sup>‡</sup> |
| <b>Treatment Facility</b><br>Community Cancer Program<br>Comprehensive Community Cancer Program<br>Academic/Research<br>Integrated Network Cancer Program | 5 (4.8%)<br>26 (25.0%)<br>62 (59.6%)<br>11 (10.6%) | 5 (4.8%)<br>32 (30.8%)<br>56 (53.8%)<br>11 (10.6%) | 0.82 <sup>‡</sup> |
| <b>Year of Diagnosis</b><br>Median (IQR)                                                                                                                  | 2011 (2009 - 2013)                                 | 2011 (2009 - 2013)                                 | 0.49 <sup>†</sup> |
| <b>T-Stage</b> <sup>§</sup><br>1                                                                                                                          | 13 (12.5%)                                         | 15 (14.4%)                                         |                   |

|                                      |            |            |                   |
|--------------------------------------|------------|------------|-------------------|
| 2                                    | 41 (39.4%) | 36 (34.6%) | 0.69 <sup>‡</sup> |
| 3                                    | 40 (38.5%) | 38 (36.5%) |                   |
| 4                                    | 10 (9.6%)  | 15 (14.4%) |                   |
| <b>Tumor Focality</b>                |            |            | 0.37 <sup>‡</sup> |
| Unifocal                             | 28 (26.9%) | 35 (33.7%) |                   |
| Multifocal                           | 76 (73.1%) | 69 (66.3%) |                   |
| <b>N-Stage<sup>§</sup></b>           |            |            | 1.00 <sup>‡</sup> |
| 0                                    | 45 (43.3%) | 46 (44.2%) |                   |
| 1                                    | 59 (56.7%) | 58 (55.8%) |                   |
| <b>Bone Metastasis</b>               |            |            | 0.38 <sup>‡</sup> |
| No                                   | 90 (86.5%) | 95 (91.3%) |                   |
| Yes                                  | 14 (13.5%) | 9 (8.7%)   |                   |
| <b>Lung Metastasis</b>               |            |            | 1.00 <sup>‡</sup> |
| No                                   | 90 (86.5%) | 91 (87.5%) |                   |
| Yes                                  | 14 (13.5%) | 13 (12.5%) |                   |
| <b>Distant Lymph Node Metastasis</b> |            |            | 0.89 <sup>‡</sup> |
| No                                   | 59 (56.7%) | 61 (58.7%) |                   |
| Yes                                  | 45 (43.3%) | 43 (41.3%) |                   |

Abbreviations. IQR- interquartile range.

† Mann-Whitney U (Wilcoxon rank-sum) test

‡ Fisher's exact test

§ American Joint Committee on Cancer (AJCC) 7<sup>th</sup> edition
